# Supplementary material for: Yap control of tissue growth relies on cell density and F-actin in zebrafish fin regeneration
Source: Oxford University Press journal article supplement (doi:10.1242/dev.119701), 2015-01-01
Supplement: dev119701supp.pdf [file dev119701supp.pdf]

## Supplementary Material

### Supplementary Figures

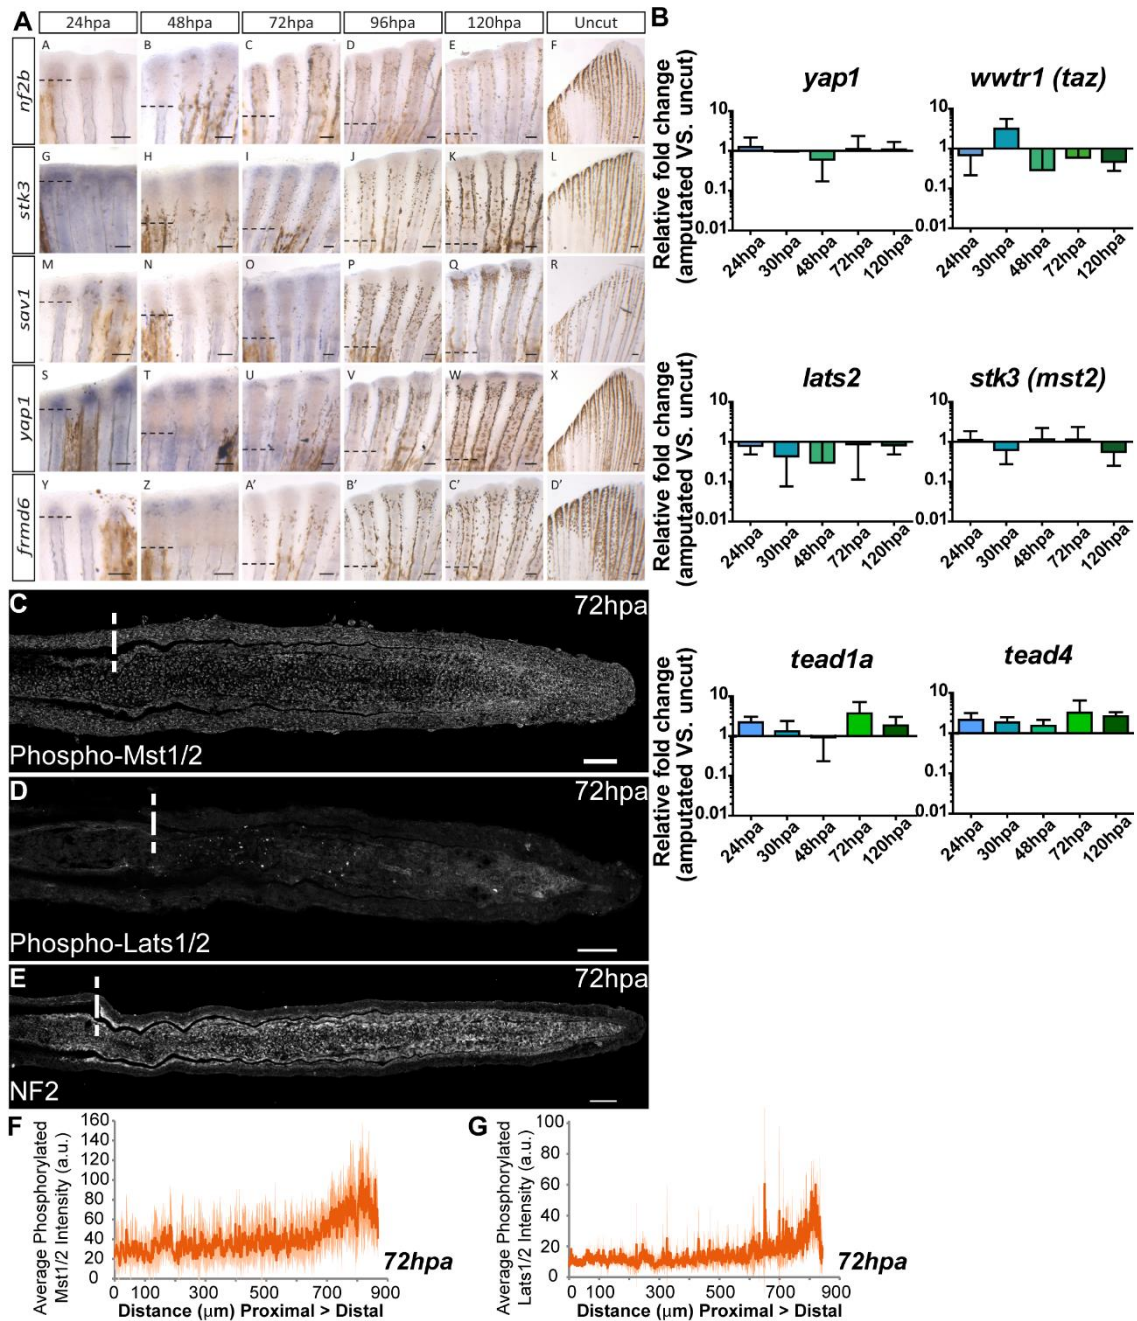

**Fig. S1. Hippo pathway components are present during zebrafish caudal fin regeneration.**

**Related to Fig 1.** A Representative *in situ* hybridizations for *nf2b*, *stk3* (*mst2*), *sav1*, *yap1* and *frmd6* (expanded) at 24 hpa, 48hpa, 72 hpa, 96 hpa, 120 hpa and uncut fins. n=3 fins per

condition. Scale bars correspond to 100µm. **B** qPCR determination of *yap1*, *wwtr1* (*taz*), *lats2*, *stk3* (*mst2*), *tead1a* and *tead4* relative expression levels during several regenerative stages (24 hpa, 30 hpa, 48 hpa, 72 hpa and 120 hpa) versus uncut controls. Logarithmic scale, base 10. **C-E** Representative immunofluorescence images against phosphorylated Mst 1/2 (**C**), phosphorylated Lats 1/2 (**D**) and total NF2 (**E**) in 72 hpa blastemas. **F-G** Quantification of average phospho-Mst 1/2 (**F**) and phospho-Lats 1/2 (**G**) intensity (in arbitrary units, a.u.) in mesenchymal cells along the PD axis (µm) of blastemas at 72 hpa. n=5 sections, 3 fish per condition. Shadows indicate the standard deviation of the mean for each curve. For all measurements, areas from the medial blastema were considered. Dashed lines indicate amputation plane. Scale bars correspond to 50µm.

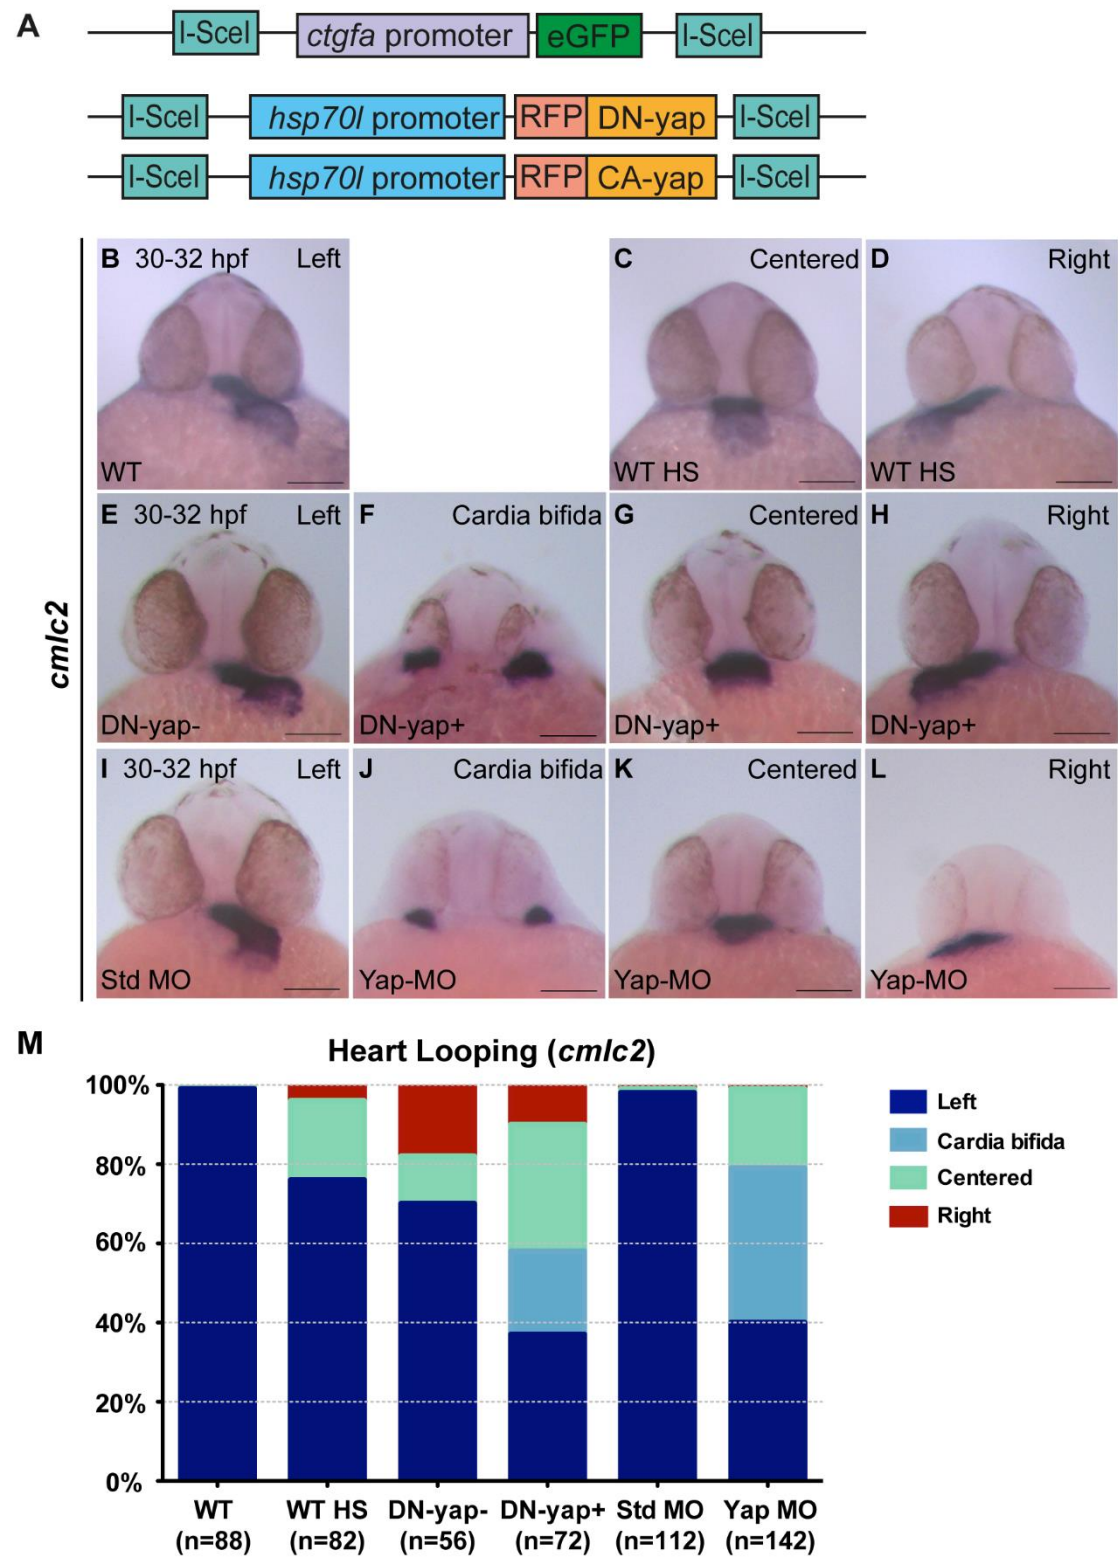

**Fig. S2. DN-Yap transgenic line regulates cardiac precursor cell migration. Related to Fig 2.** A Schematics of the constructs of the transgenics used in this study. Note that CA-yap transgenics have mutated the five *yap1* consensus motifs HxRxxS recognized by Lats 1/2,

having the Serines substituted by Alanines, not allowing Yap to be inactivated through phosphorylation (Zhao et al., 2007). In DN-yap transgenics, a truncated form of CA-yap was used, in which the transcriptional activation domain was removed, but its Tead binding domain was left intact, allowing Yap to bind to its DNA partner but not activate its targets (Zhao et al., 2007). **B-M** Zebrafish embryos with 30-32 hpf examined for cardiac jogging by *in situ* hybridization for *cmlc2*. **B-D** WT embryos with normal left-sided heart jogging (99%) (**B**) and few centered hearts (1%) (not shown). WT embryos given a heat-shock (hs) at 16 cells stage develop centered (20%) (**C**) and right-sided hearts (4%) (**D**), consequence of the hs itself. **E-H** A hs was given to DN-yap siblings (DN-yap-) at 16 cells stage, with the majority of embryos developing left-sided hearts (70%) (**E**), centered (12%) and right-sided (18%) hearts, the latter being a consequence of the hs itself (not shown). DN-yap positive (DN-yap+) transgenic embryos were activated at 16 cells stage with a hs and develop cardia bifida (21%) (**F**), a characteristic phenotype of loss of Yap (Fukui et al., 2014; Miesfeld and Link, 2014). They also develop centered (32%) (**G**), right (10%) (**H**) and left-sided hearts (37%) (not shown). **I-L** Standard-MO (6 ng) WT injected embryos develop mainly left-sided hearts (98%) (**I**), with few developing centered (1%) and right-sided (1%) hearts (not shown). Yap-MO (6 ng) WT injected embryos develop cardia bifida (39%) as previously shown (**J**) (Fukui et al., 2014; Miesfeld and Link, 2014). They also develop centered (20%) (**K**), right (1%) (**L**) and left-sided hearts (40%) (not shown). **M** Percentage of embryos with different phenotypes for heart jogging. Total number of embryos is shown in the bottom of each column. All scale bars are 100µm.



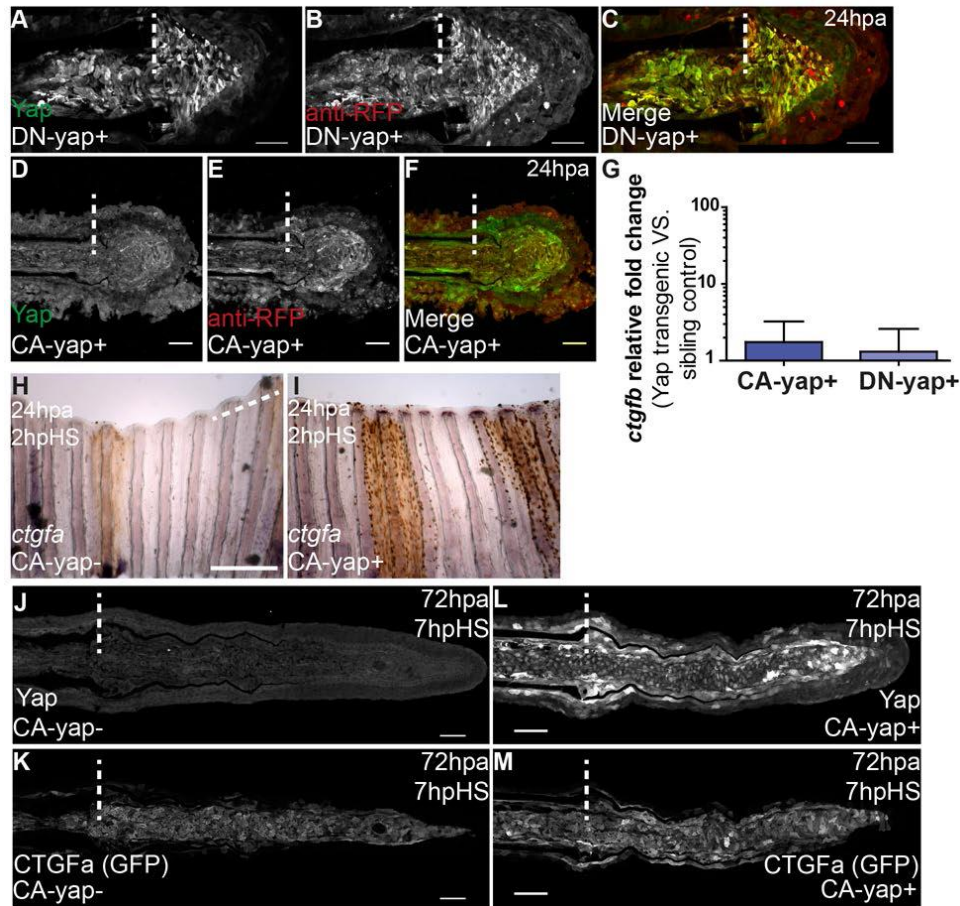

**Fig. S3 *ctgfa* is conserved as a direct transcriptional target of Yap in zebrafish. Related to Figs 2 and 3.** **A-F** Representative immunostainings with anti-Yap and anti-RFP in 24 hpa longitudinal sections of CA-yap and DN-Yap positive transgenics, upon heat-shock. **A-C** DN-Yap+; **D-F** CA-Yap+. Note that for further experiments anti-Yap was used instead of anti-RFP due to clearer intracellular labeling. **G** qPCR determination of *ctgfb* relative expression levels in CA-yap and DN-yap positive transgenics versus respective sibling controls, upon single heat-shock at 72 hpa. Logarithmic scale, base 10. **H-I** Representative *in situ* hybridization for *ctgfa* in 24 hpa fins of CA-yap sibling control (**H**) and CA-yap+ fish (**I**). Fins were collected at 2 hpHS. n=3 fins per condition. Scale bars correspond to 500µm. **J-M** Representative immunostainings with anti-Yap and anti-GFP in 72 hpa longitudinal sections of *ctgfa*:eGFP; CA-yap double transgenics, fins were fixed at 7 hpHS. **J,K** CA-yap sibling control; **L,M** CA-yap+. Note that due to high Yap levels in L, normal settings in acquisition of images in J, L had to be decreased to avoid image saturation. n=9 sections, 3 fish per condition. Scale bars correspond to 50µm. Dashed lines indicate amputation plane.

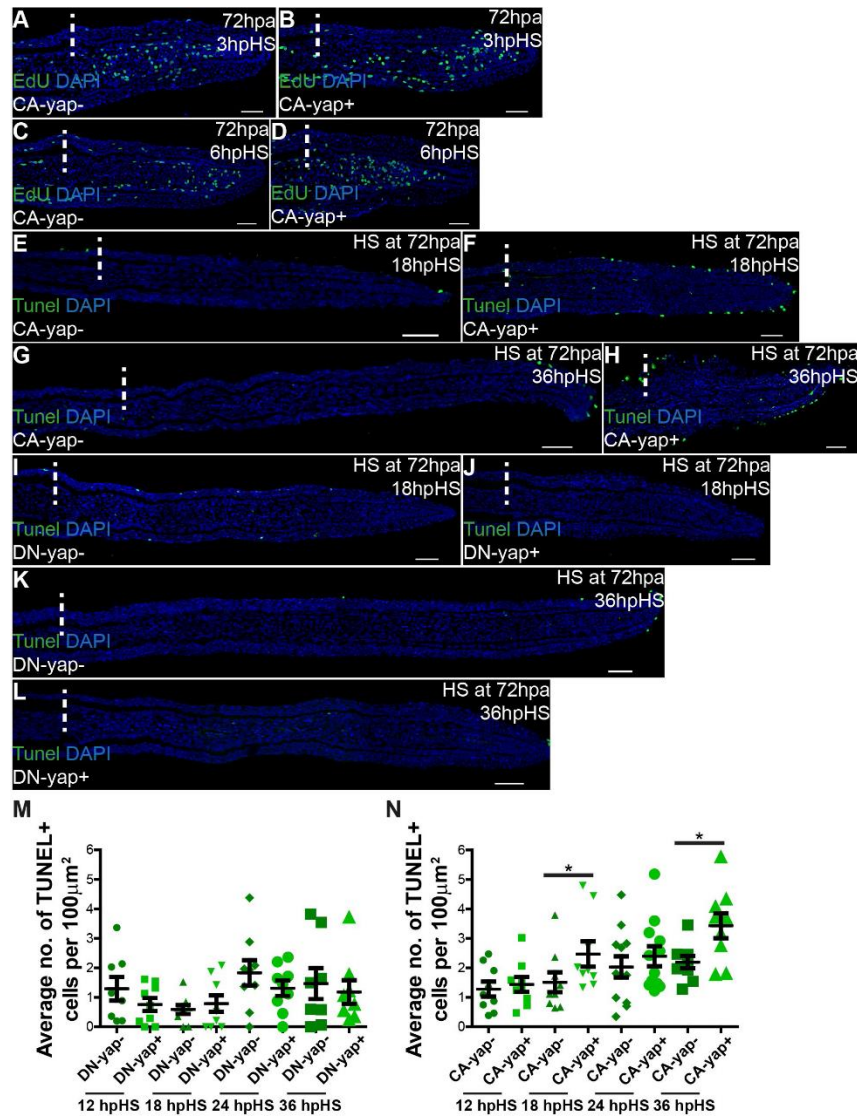

**Fig. S4 Cell death occurs after the proliferative boost in CA-Yap transgenics but not in DN-Yap transgenics.** A-D Representative immunofluorescence with EdU in 72 hpa longitudinal sections of CA-yap sibling controls (A) and CA-yap positive fish (B) at 3 hours post single heat-shock (hpHS); CA-yap sibling controls (C) and CA-yap positive fish (D) at 6 hpHS. Representative immunofluorescence with TUNEL in 90 and 108 hpa longitudinal sections of CA-yap sibling controls (E,G), CA-yap positive (F,H), DN-yap sibling controls (I,K) and DN-yap positive transgenics (J,L). Scale bars correspond to 50μm. M-N Quantification of average TUNEL positive cells occurring per 100μm<sup>2</sup> in DN-yap and siblings (M) and CA-yap and siblings (N), at different times post amputation, after a single heat-shock at 72 hpa. \*P value<0.05, two tailed, non-parametric Mann-Whitney test. n=9 sections, 3 fish per condition. Dashed lines indicate amputation plane.

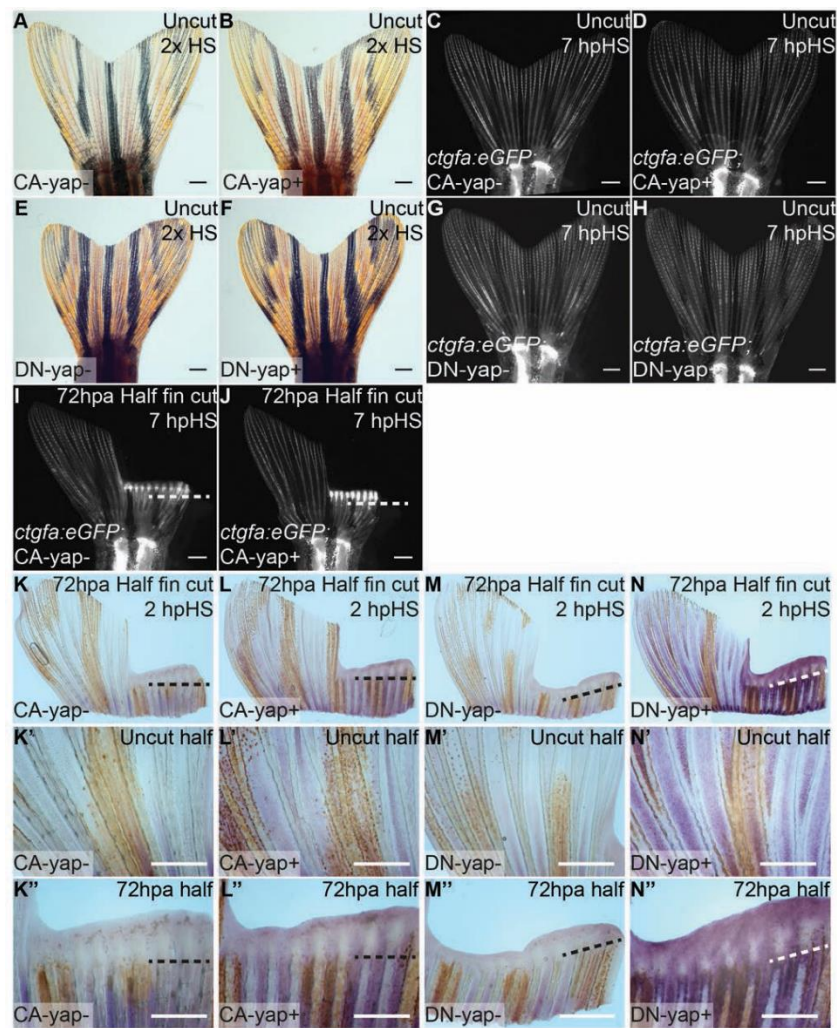

**Fig. S5. Yap is not activated in a homeostatic context.** **A-B, E-F** Representative brightfield images of uninjured CA-yap/DN-yap transgenics upon heat-shock in 2 consecutive days, phenotypes were accessed the next day. **A** CA-yap control; **B** CA-yap<sup>+</sup>; **E** DN-yap control; **F** DN-yap<sup>+</sup>. **C-D, G-H, I-J** Representative *ctgfa* expression in double transgenics *ctgfa*:eGFP; CA-yap/DN-yap and siblings upon heat-shock in uncut or 72 hpa half amputated fin animals, at 7 hpHS. **C** CA-yap control; **D** CA-yap<sup>+</sup>; **G** DN-yap control; **H** DN-yap<sup>+</sup>; **I** CA-yap control; **J** CA-yap<sup>+</sup>. n=5 fish/ condition. **K-N** Representative *in situ* hybridizations for *yap1* in 72 hpa half amputated fins of CA-yap control (**K**), CA-yap<sup>+</sup> (**L**), DN-yap control (**M**), DN-yap<sup>+</sup> (**N**). Corresponding zooms of uncut half (**K'-N'**), 72 hpa regenerate half (**K''-N''**) of *in situs* shown in K-N, highlighting *yap1* differences in CA-yap/DN-yap transgenics versus siblings. Fins were collected at 2 hpHS. n=3 fins/condition. Scale bars=500μm. Dashed lines indicate amputation plane.



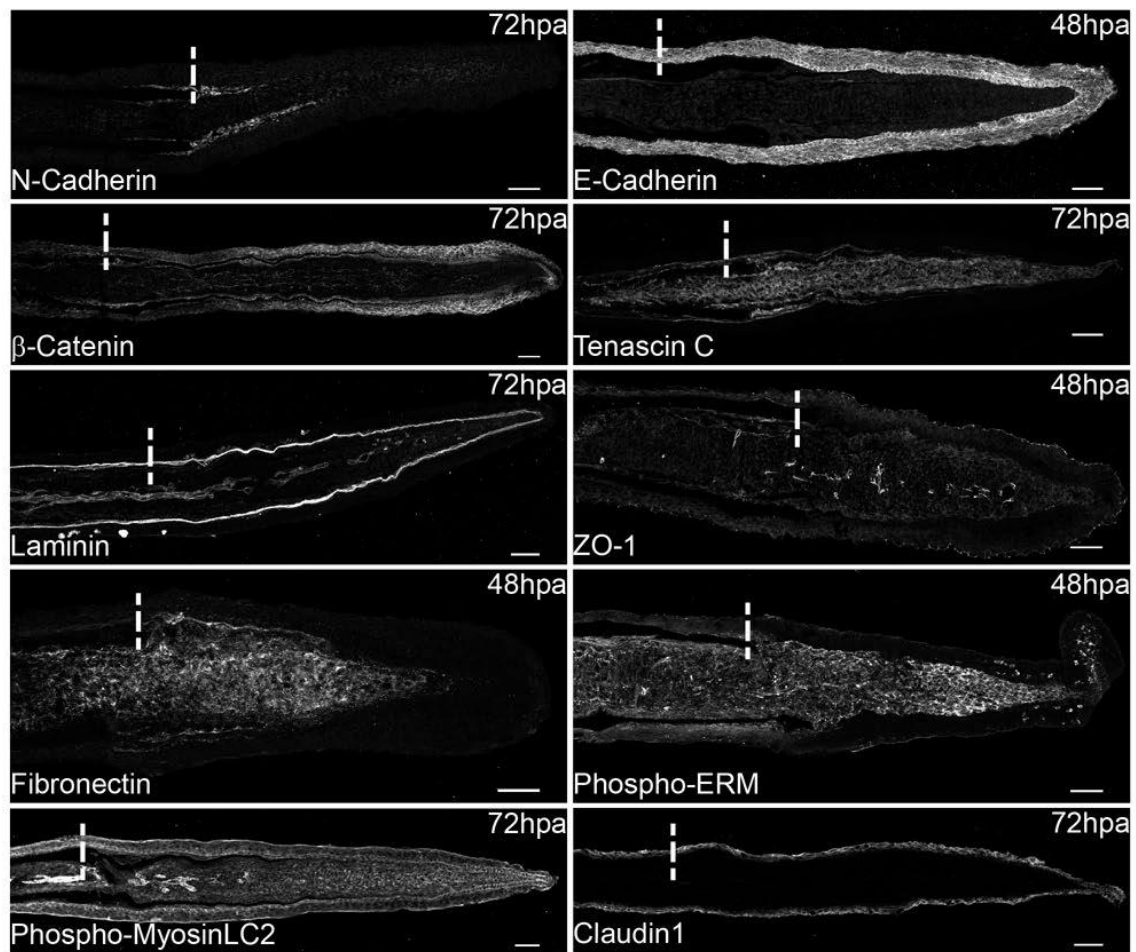

**Fig. S6. Novel adhesion and cytoskeleton proteins expressed in the regenerating blastema.**  
**Related to Fig 4.** Representative immunostainings of positive hits found in the adhesion and cytoskeleton related screen performed in formed blastemas (48 and 72 hpa longitudinal sections). n=3 sections per condition. Dashed lines indicate amputation plane. Scale bars correspond to 50μm.



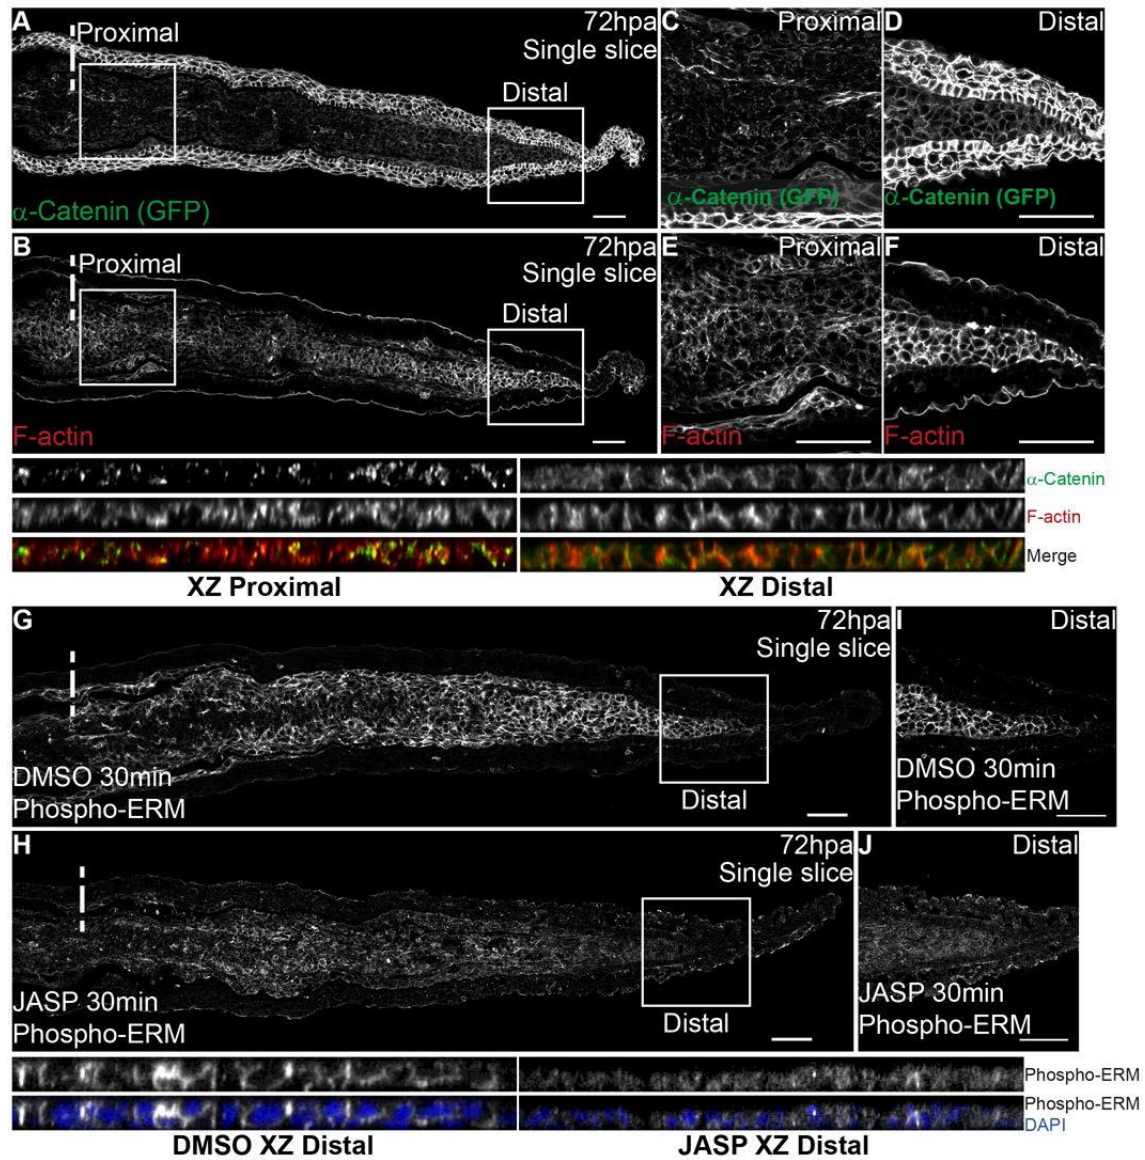

**Fig. S7.  $\alpha$ -Catenin and F-actin partially co-localize in the regenerating blastema. Related to Fig 6.** **A,B** Representative immunofluorescence with anti-GFP and phalloidin (F-actin) in 72 hpa longitudinal sections of  $\alpha$ -Catenin transgenics. **A** Representative single frame of  $\alpha$ -Catenin; **B** Corresponding single frame of F-actin. **C-F** Corresponding zoomed areas represented by squares in A-B. Proximal (**C**) and distal (**D**) zoomed images from A showing the differential  $\alpha$ -Catenin expression along the PD axis. Corresponding proximal (**E**) and distal (**F**) zoomed images from B showing the differential F-actin expression along the PD axis. Single color and merged XZ projections of proximal blastema images C,E and distal blastema images D,F are shown below the corresponding panel to highlight intracellular localization. n=9 sections, 3 fish.

**G-H** Representative immunofluorescence with anti-Phospho-ERM (representing F-actin) in 72 hpa longitudinal sections of animals injected with Jasplakinolide (JASP) and respective DMSO controls. Phospho-ERM expression in DMSO (**G**) and JASP (**H**) animals. **I-J** Zoomed areas represented by squares in G-H, showing Phospho-ERM expression in the distal blastema of DMSO (**I**) and JASP (**J**) animals. Corresponding XZ projections of distal blastema images I-J are shown to highlight intracellular localization in both situations; single color images showing Phospho-ERM expression and merged with DAPI. Intraperitoneal injections were performed in 72 hpa animals, 30 minutes pre-fixation of the caudal fins. n=8 sections, 4 fish per condition. Dashed lines indicate amputation plane. Scale bars correspond to 50µm.

## Supplementary Materials and Methods

### Transgenic line generation

The transgenic lines used were: GT(ctnna-Citrine)<sup>ct3a</sup> (Žigman et al., 2010), Tg(EF1α:mAG-zGem(1/100))<sup>rw0410h</sup> (Sugiyama et al., 2009). These lines were kindly provided by Mihaela Žigman and Atsushi Miyawaki. To create the *ctgfa*:eGFP reporter line, a pBSII-SK+ vector containing a 3.0Kbp upstream promoter fragment of *ctgfa*, flanked with *I-SceI* sites, was coinjected with *I-SceI* meganuclease (Roche), as published (Soroldoni et al., 2009). This construct was kindly provided by Dr. Jyh-Yih Chen and the original promoter sequence has been published by his laboratory (Chiou et al., 2006). Transgenic animals were selected starting at 1 day post fertilization (dpf) by eGFP fluorescence along the body.

To generate hsp70:RFP-CA-Yap, the constitutively active *yap1* sequence (CA-Yap) was constructed by sequentially point mutating five Serines to Alanines (S21A, S69A, S87A, S119A, S335A) with the following primers: FWD 5'-GTTCGGGGA GACGCTGAGACCGATCTGGAG-3'; REV 5'-CTCCAGATCGGTCTCAGCGTCTCC CCGAAC-3' (for S21A); FWD 5'-CAGACAAGCCGCTACAGATGCAGGTAC-3'; REV 5'-GTACCTGCATCTGTAGCGGCTTGTCTG-3' (for S69A); FWD 5'-CACGTC CGGGCACACGCTTCACCTGCCTCC-3'; REV 5'-GGAGGCAGGTGAAGCGTGTG CCCGGACGTG-3' (for S87A); FWD 5'-CTCCGCCAGTCCGCTTACGAGATACCTG-3'; REV 5'-CAGGTATCTCGTAAGCGGACTGGCGGAG-3' (for S119A); FWD 5'-TCTAGA GACGAGGCTACAGACAGTGGCCTG-3'; FWD 5'-CAGGCCACTGTCTGTAGCCTCG TCTCTAGA-3' (for S335A) (Zhao et al., 2007). The resultant CA-Yap was cloned downstream of monomeric RFP in a pcDNA3 vector with XhoI/NotI sites. The RFP-CA-Yap cassette was released and subcloned downstream of a zebrafish hsp70 promoter. To construct hsp70:RFP-DN-Yap, the dominant negative *yap1* sequence (DN-yap), was cloned by amplifying a fragment (nt 4-741) from CA-Yap and subcloned downstream of monomeric RFP in a pcDNA3 vector with XhoI/NotI sites. The RFP-DN-Yap cassette was released and subcloned downstream of the zebrafish hsp70 promoter. The final hsp70:RFP-CA-Yap and hsp70:RFP-DN-Yap constructs,

flanked with *I-SceI* sites, were co-injected with *I-SceI* meganuclease as above. Embryos were selected starting at 2 dpf by RFP fluorescence in the lens, due to endogenous hsp70 promoter activity (Lee et al., 2005). Transgenic founders were selected by examining red fluorescence in the lens in the resulting progeny. Induction of RFP-CA-Yap and RFP-DN-Yap were further confirmed by heat-shock of animals. Microinjections to generate transgenics were performed at one cell-stage in wild type AB strain zebrafish embryos.

### Image quantification

For quantification of Yap intracellular localization, longitudinal sections of individual regenerating blastemas in defined time points stained with anti-Yap and DAPI, were imaged with a Zeiss LSM710 confocal microscope using identical settings (magnification, contrast, gain and exposure time) and XZ projections were made. For each XZ projection, we applied a threshold (8-25 index) in the DAPI channel (visualizing nuclei) to create a binary mask. The DAPI binary mask was superimposed to the anti-Yap channel using the Image Calculator (Multiply option), resulting in the nuclear Yap images. The same approach was followed to obtain cytoplasmic Yap images using the inverse mask. The average intensities of nuclear and cytoplasmic Yap images were determined and normalized to the area. The resultant individual data was processed using Excel, where a ratio of nuclear Yap intensity over cytoplasmic Yap values was calculated for each sample. Total ratios for each condition were plotted using GraphPad Prism software and non-parametric, two-tailed Mann-Whitney tests were performed between the several conditions. For quantification of Yap, F-actin and  $\alpha$ -Catenin shifts between proximal and distal locations, longitudinal sections of individual regenerating blastemas in defined time points stained with anti-Yap and phalloidin or anti-GFP (to detect  $\alpha$ -Catenin) were imaged as above. For each XZ projection, plot profiles of corresponding intensities were measured, in which maximum intensity values for distal images and minimum intensity values for proximal images were recorded. The resultant individual data was processed using Excel,



where a ratio of proximal over distal values was calculated for each sample. Total ratios were plotted as above.

Proliferation quantifications were performed using an ImageJ plugin, ObjectJ. This plugin was used to manually identify all Geminin and pH3 positive cells and quantify the respective blastema area including the 1<sup>st</sup> segment proximal to the amputation level. Resultant data was processed and normalized (area normalization) using Excel. Normalized cell divisions (total numbers) were plotted using GraphPad Prism software, and two-tailed Mann-Whitney tests were performed between the several conditions.

For cell density measurements in the blastema, longitudinal sections of individual regenerating blastemas in defined time points counterstained with DAPI to reveal their total nuclei, were imaged with a Zeiss LSM710 confocal microscope using identical settings (magnification, contrast, gain and exposure time). Intensity measurements along blastemas including the 1<sup>st</sup> segment proximal to the amputation plane were done with the Plot profile tool in ImageJ along rectangular regions of interest (Knopf et al., 2011). The same analysis was performed in intensity quantifications of Phospho-Mst 1/2, Phospho-Lats 1/2 and GFP fluorescence in CA-yap; *ctgfa*:eGFP and DN-yap; *ctgfa*:eGFP transgenics. In the latter case, *in vivo* fluorescent images from individual blastemas of *ctgfa*:eGFP transgenics were acquired using a Zeiss Lumar stereoscope along the full fin including the regenerate.

For intercellular mesenchymal space quantifications in the blastema, longitudinal sections of *ctgfa*:eGFP individual regenerating blastemas in defined time points were analyzed after immunofluorescence with anti-GFP, to reveal the mesenchymal cells morphology and space occupied within the blastema. Imaging was performed in a similar way as above. A threshold (index 35) was applied to the images in order to label all the intercellular mesenchymal space, the LUT was inverted and intensity measurements were performed in a similar way as above. For cell aspect ratio determination, individual mesenchymal cells were manually outlined using ImageJ and measurements to determine values for *x* (major) and *y* (minor) axes of the cells were performed using the Fit Ellipse plugin. Resultant individual data was processed using Excel, where *y* divided by *x* values for each cell were plotted in order to have individual cell aspect

ratios - in which a perfect circular shape corresponds to a ratio between  $y$  and  $x$  equal to 1. Total ratios for each condition were plotted using GraphPad Prism software, and two-tailed Mann-Whitney tests were performed between the several conditions. All error bars in graphs correspond to the standard deviation of the mean.

## Supplementary Tables

**Table S1. Proteins screened through immunohistochemistry in the regenerating blastema.**  
**Related to Figs 5 and 6.**

| Protein              | Present in blastema | Stages tested                          | Cell type labeled                                                                                            | Type of adhesion associated           |
|----------------------|---------------------|----------------------------------------|--------------------------------------------------------------------------------------------------------------|---------------------------------------|
| $\alpha$ -Catenin    | Yes                 | Uncut, 24hpa, 48hpa, 72hpa             | Most distal mesenchymal cells; osteoblasts; present in all layers of epidermis (a)                           | Adherens junction                     |
| Beta-Catenin         | Yes                 | Uncut, 3hpa, 6hpa, 24hpa, 48hpa, 72hpa | In early stages in the mesenchyme, present in some layers of epidermis, osteoblasts (a)                      | Adherens junction                     |
| P120-Catenin         | No                  | 72hpa                                  | --                                                                                                           | Adherens junction                     |
| E-Cadherin           | Yes                 | 48hpa, 72hpa                           | All layers of epidermis                                                                                      | Adherens junction                     |
| N-Cadherin           | Yes                 | 72hpa                                  | New osteoblasts (a)                                                                                          | Adherens junction                     |
| M-Cadherin           | No                  | 72hpa                                  | --                                                                                                           | Adherens junction                     |
| P-Cadherin           | No                  | 72hpa                                  | --                                                                                                           | Adherens junction                     |
| R-Cadherin           | No                  | 72hpa                                  | --                                                                                                           | Adherens junction                     |
| Cadherin 5           | No                  | 72hpa                                  | --                                                                                                           | Adherens junction                     |
| Cadherin 11          | No                  | 72hpa                                  | --                                                                                                           | Adherens junction                     |
| Zyxin                | No                  | 72hpa                                  | --                                                                                                           | Integrin and Actin associated protein |
| ZO-1                 | Yes                 | 48hpa, 72hpa                           | Most apical layer of epidermis, blood vessels                                                                | Tight junction                        |
| Claudin 1            | Yes                 | 72hpa                                  | Most epidermal layers                                                                                        | Tight junction                        |
| Fibronectin          | Yes                 | 48hpa, 72hpa                           | Extracellular matrix of all fibroblast-like cells                                                            | Extracellular matrix                  |
| Laminin              | Yes                 | 24hpa, 48hpa, 72hpa                    | Extracellular space between basal epidermal layer and mesenchyme, blood vessels                              | Extracellular matrix                  |
| Tenascin C           | Yes                 | 24hpa, 48hpa, 72hpa                    | Extracellular space of all mesenchyme (b)                                                                    | Extracellular matrix                  |
| F-Actin (Phalloidin) | Yes                 | Uncut, 6hpa, 24hpa, 48hpa, 72hpa       | Initially in epidermis, later restricted to most apical layer of epidermis and all mesenchyme, blood vessels | Cytoskeleton                          |
| Phospho-             | Yes                 | Uncut, 6hpa,                           | Initially in                                                                                                 | Cytoskeleton                          |

|                                      |     |                     |                                                                      |                                        |
|--------------------------------------|-----|---------------------|----------------------------------------------------------------------|----------------------------------------|
| Myosin Light Chain 2                 |     | 24hpa, 48hpa, 72hpa | epidermis, later both in epidermis and all mesenchyme, blood vessels |                                        |
| Phospho-Ezrin/ Radixin/ Moesin (ERM) | Yes | 48hpa, 72hpa        | Similar to F-actin                                                   | Cytoskeleton, Actin associated protein |
| Scribble                             | No  | 72hpa               | --                                                                   | Tight junction                         |
| Vinculin                             | No  | 72hpa               | --                                                                   | Integrin associated protein            |

(a) Published in (Stewart et al., 2014), (b) Published in (Jaźwińska et al., 2007).



**Table S2. Sequences of primers used for cloning and qPCR analysis during this study.**

| Gene/<br>Accession no.                           | Primer sequence                                                             |                                                                             | Human/<br><i>Drosophila</i><br>orthologue |
|--------------------------------------------------|-----------------------------------------------------------------------------|-----------------------------------------------------------------------------|-------------------------------------------|
|                                                  | Forward Primer (5')                                                         | Reverse Primer (3')                                                         |                                           |
| <i>frmd6</i> /<br>NM_001020816                   | CCATCGATATGAGCAAAC<br>GACTTTCCACA                                           | CGGGCCCTTACACCACAAA<br>CTCTGGTTCTG                                          | <i>frmd6(willin)</i><br>/expanded         |
| <i>nf2b</i> /<br>NM_212951                       | CGGGCCTGGTTTAACACAT<br>A                                                    | CAACAGAGCTCGGATTGTT<br>CT                                                   | <i>nf2/merlin</i>                         |
| <i>sav1</i> /<br>NM_001004560                    | GTGTCAGTGCCAACCTGGA<br>T                                                    | AGTAAGCTGTCTGAGTGTG<br>TCA                                                  | <i>salvador</i>                           |
| <i>stk3</i> /<br>NM_199672                       | GCAGTGCTTCCTTAAACTC<br>CAAAC<br>qPCR:<br>CCCAGAACAGAGAGCGAC<br>GGCAACTCAACT | GCAGGAATCTAGAGTAAG<br>ATGCAG<br>qPCR:<br>GCCAGCACTCTCGGAACCA<br>GACTTCACCAT | <i>mst2/hippo</i>                         |
| <i>lats2</i> /<br>ENS DART00000<br>139620        | qPCR:<br>GCGTGCCCTGAAACAGACT<br>GGTAGCCGTAA                                 | qPCR:<br>GCGTGCCCTGAAACAGACT<br>GGTAGCCGTAA                                 | <i>lats2/warts</i>                        |
| <i>wwtr1</i> /<br>NM_001037696                   | qPCR:<br>TGTTACAGCATCCCGACCA<br>CTCCTGAAGAC                                 | qPCR:<br>CCAGGTGAGGAAGGGCTC<br>GCTCTTGTT                                    | <i>wwtr1(taz)</i><br>/n.a.                |
| <i>yap1</i> /<br>NM_001139480                    | CGACTTTCCTTGAAAACGG<br>T<br>qPCR:<br>AGCCAAAGTCCCACTCCAG<br>ACAAGCCAGTA     | AAGGTGTAGTGCTGGGTTC<br>G<br>qPCR:<br>GGCAGCGGCATGTCATCA<br>GGTATCTCGTAA     | <i>yap/yki</i>                            |
| <i>tead1a</i> /<br>NM_212847.2                   | qPCR:<br>GCGAACGGGCAAGACACG<br>GACAAGAAAGC                                  | qPCR:<br>ACTGTGGATGGCTGTGGCG<br>GAGACAATCTG                                 | <i>tead1/<br/>scalloped</i>               |
| <i>tead4</i> /<br>XM_002666763.<br>3             | qPCR:<br>AAGGAGGACTGAAGGAGC<br>TGTTTCGAGAAGG                                | qPCR:<br>GCCGAATGAGCAGACTTTA<br>GTGGAGGAGGT                                 | <i>tead4 /<br/>scalloped</i>              |
| <i>ctgfa</i> /<br>NM_001015041                   | qPCR:<br>TCCTCACAGAACCGCCACC<br>TTGCCCAT                                    | qPCR:<br>TCACGCCATGTCGCCAACC<br>ATCTTCTTGT                                  | <i>ctgf/n.a.</i>                          |
| <i>ctgfb</i> /<br>NM_001102573                   | qPCR:<br>GAGACAGGCATCTGCATG<br>GCTCAAGAAGGT                                 | qPCR:<br>GTCGCACACCCACTCCTCA<br>CAGCACTT                                    | <i>ctgf/n.a.</i>                          |
| <i>amphiregulin</i> /<br>ENS DART00000<br>114293 | qPCR:<br>ACACTTCCGTGCTGGATCA<br>TGTGACTGTGA                                 | qPCR:<br>TGGTTCTGCTCGTCTCCTTT<br>ACTGGCTTGG                                 | <i>amphiregulin/<br/>n.a</i>              |
| <i>fgf20a</i> /<br>NM_001037103                  | qPCR:<br>GGTTCGGTCCAAGGCACG<br>AGG                                          | qPCR:<br>CGCTCGCCATGCCGATACA<br>GG                                          | <i>fgf20/n.a.</i>                         |
| <i>msxB</i> /<br>NM_131260                       | qPCR:<br>CCAGCAGGTCGCGTGTCT<br>CC                                           | qPCR:<br>GCTTGCCTAAGGTGCACGG<br>C                                           | <i>n.a./drop</i>                          |
| <i>wnt10a</i> /<br>NM_130980                     | qPCR:<br>GCTCTCACGACATCAGTTG<br>GCACTCTCC                                   | qPCR:<br>AAGTAATCCATGCTGCTGC<br>TGCTCTTCTGC                                 | <i>wnt10a/wnt10</i>                       |
| <i>wnt3a</i> /<br>NM_001007185                   | qPCR:<br>GCCCTGATGCCCCGCTCTGC<br>TATGAATC                                   | qPCR:<br>CCGATGTTTCTCAACCACC<br>ATTCCGATGC                                  | <i>wnt3a/n.a.</i>                         |
| <i>lef1</i> /<br>NM_131426                       | qPCR:<br>AAGGCCACCCGTACCCGA<br>GT                                           | qPCR:<br>GGGTGAACGGCATGGGAC<br>GG                                           | <i>lef1/pangolin</i>                      |

|                                |                                                    |                                                    |                  |
|--------------------------------|----------------------------------------------------|----------------------------------------------------|------------------|
| <i>dkk1a</i> /<br>NM_001281800 | <b>qPCR:</b><br>ACATCCCAGGAGAACCAC<br>AG (a)       | <b>qPCR:</b><br>AAACTTGTCCCTCTGTCAG<br>CA (a)      | <i>dkk1/n.a.</i> |
| <i>dkk1b</i> /<br>NM_131003    | <b>qPCR:</b><br>CTCCGCTCACCCAGGGAAT<br>ACATCCTACAA | <b>qPCR:</b><br>ACCCGCCGCACCTGAACCG<br>ACTTTA      | <i>dkk1/n.a.</i> |
| <i>shha</i> /<br>NM_131063     | <b>qPCR:</b><br>GGCCAGGGGTTAAGCTGC<br>GT           | <b>qPCR:</b><br>CGGCCTTCTGTCCTCCGTC<br>C           | <i>shh/hh</i>    |
| <i>bmp2a</i> /<br>NM_131359    | <b>qPCR:</b><br>CACTCCGTGAACGCAGAG<br>CAGGTTAGCA   | <b>qPCR:</b><br>TCGTCTGGGATGGAGGTCA<br>GGTTGAAGAGG | <i>bmp2/dpp</i>  |
| <i>bmp2b</i> /<br>NM_131360    | <b>qPCR:</b><br>AACCTACAGCCATGACGGT<br>CAAGGCACAG  | <b>qPCR:</b><br>CGTCCAGCCGACATCACT<br>GAAGTCCACAT  | <i>bmp2/dpp</i>  |

(a) Published in (Stewart et al., 2014).

**Table S3. Details for RNA probes used in the *in situ* hybridization analysis during this study.**

| Gene                        | Vector      | Sense Probe        |            | Antisense Probe    |            | Hybridization Temperature |
|-----------------------------|-------------|--------------------|------------|--------------------|------------|---------------------------|
|                             |             | Restriction Enzyme | Polymerase | Restriction Enzyme | Polymerase |                           |
| <i>frmd6</i>                | pCS2        | EcoRV              | SP6        | BamHI              | T3         | 68°C                      |
| <i>nf2b</i>                 | pGEM-T-Easy | NcoI               | SP6        | SpeI               | T7         | 67°C                      |
| <i>sav1</i>                 | pGEM-T-Easy | NcoI               | SP6        | Sall               | T7         | 66°C                      |
| <i>stk3</i>                 | pGEM-T-Easy | ApaI               | SP6        | Sall               | T7         | 67°C                      |
| <i>yap1</i>                 | pGEM-T-Easy | Sall               | T7         | NcoI               | SP6        | 68°C                      |
| <i>ctgfa</i> <sup>(c)</sup> | pSport      | BamHI              | T7         | EcoRI              | SP6        | 67°C                      |

(c) Published in (Dickmeis et al., 2004).

**Table S4. Antibodies used in the immunofluorescence analysis during this study.**

| <b>Antibody</b>                                                | <b>Host</b> | <b>Dilution</b> | <b>Company</b>         |
|----------------------------------------------------------------|-------------|-----------------|------------------------|
| Anti-Yap FL (63.07)                                            | Mouse       | 1:100           | Sta Cruz Biotechnology |
| Anti-Phospho Mst1(Thr18)/Mst2(Thr180)                          | Rabbit      | 1:100           | Cell Signalling        |
| Anti-Phospho Lats1 (Thr1079)                                   | Rabbit      | 1:100           | Cell Signalling        |
| Anti-NF2                                                       | Rabbit      | 1:200           | Sta Cruz Biotechnology |
| Anti-GFP                                                       | Rabbit      | 1:200           | Invitrogen             |
| Anti RFP/DsRed                                                 | Rabbit      | 1:100           | ABIN                   |
| Anti-Beta-Catenin                                              | Mouse       | 1:200           | BD Transduction labs   |
| Anti-E-Cadherin                                                | Mouse       | 1:200           | BD Transduction labs   |
| Anti-N-Cadherin                                                | Mouse       | 1:100           | BD Transduction labs   |
| Anti-R-Cadherin                                                | Mouse       | 1:100           | BD Transduction labs   |
| Anti-P-cadherin                                                | Mouse       | 1:100           | BD Transduction labs   |
| Anti-M-cadherin                                                | Mouse       | 1:100           | BD Transduction labs   |
| Anti-ZO1                                                       | Mouse       | 1:100           | Invitrogen             |
| Anti-Claudin1                                                  | Rabbit      | 1:100           | Invitrogen             |
| Anti-Fibronectin                                               | Rabbit      | 1:100           | Sigma                  |
| Anti-Laminin                                                   | Rabbit      | 1:100           | Thermo Scientific      |
| Anti-TenascinC                                                 | Rabbit      | 1:100           | US Biological          |
| Anti-Zyxin                                                     | Mouse       | 1:100           | Sigma                  |
| Anti-Cadherin5                                                 | Mouse       | 1:100           | BD Transduction labs   |
| Anti-p120-Catenin                                              | Mouse       | 1:100           | BD Transduction labs   |
| Anti- $\alpha$ -Catenin                                        | Mouse       | 1:100           | BD Transduction labs   |
| Anti- $\beta$ -Catenin                                         | Mouse       | 1:100           | BD Transduction labs   |
| Anti-Cadherin11                                                | Mouse       | 1:100           | Invitrogen             |
| Anti-Phospho Ezrin (Thr567)/ Radixin (Thr564)/ Moesin (Thr558) | Rabbit      | 1:100           | Cell Signalling        |
| Anti-Phospho Myosin Light Chain 2 (Ser19)                      | Rabbit      | 1:100           | Cell Signalling        |
| Anti-Scribble                                                  | Goat        | 1:100           | Sta Cruz Biotechnology |
| Anti-Vinculin                                                  | Mouse       | 1:100           | Sigma                  |
| Anti-Phospho Histone 3                                         | Rabbit      | 1:400           | Millipore              |
| Alexa 488 anti-rabbit                                          | Goat        | 1:500           | Invitrogen             |
| Alexa 488 anti-mouse                                           |             |                 |                        |
| Alexa 568 anti-mouse                                           |             |                 |                        |
| Alexa 633 anti-rabbit                                          |             |                 |                        |
| Alexa 488 anti-goat                                            | Donkey      | 1:500           | Invitrogen             |
